# Supplementary material for: The effect of heterogeneous Transcription Start Sites (TSS) on the translatome: implications for the mammalian cellular phenotype
Source: PubMed Central journal article supplement (PMC4654819; doi:10.1186/s12864-015-2179-8), 2015-11-21
Supplement: 12864_2015_2179_MOESM1_ESM.pdf [file 12864_2015_2179_MOESM1_ESM.pdf]

## Supplementary Methods.

Oligos used to generate the 5' TL fusions to the LP/SP reporter.

CAMKK1 V1/3 5'-GATCTGAATTCCTGGGCCCCAGCGAGGCGGT-3'  
5'-CCTCCATGGCTTCAGTCAAGGGGGT-3'

CAMKK1 V2 5'-GATCTGAATTCAGCAGAACAGAGTATGCAAT-3'  
5'-CCCCTCCATGGCTTCAGTCAAGG-3'

CCND3 V1 5'-GATCTGAATTCACCTATGCCGCGTGGGGCGG-3'  
5'-CCAGGTAGTCCATGGCCAGGGGGAAC-3'

CCND3 V2/3 5'-GATCTGAATTCATTCCACGGTTGCTACATCG-3'  
5'-AGCAGCTCCATGGTCGGGCAGCGAAC-3'

CLDN7 V1/3 5'-GATCTGAATTCGGAAAAAAAAAGGAGAGCAGC-3'  
5'-TTGGCCATGGCCGCCCTCAGAAAAC-3'

CLDN7 V2 5'-GATCTGAATTCTCCAGTTAGGAGCCTTGATG-3'  
5'-TTGGCCATGGCCGCCCTCAGAAAAC-3'

53BP1 V1/2 5'-GATCTGAATTCGAGTTCGCGGCCGGTGGCGG-3'  
5'-CCCAGCCATGGCGGCGGGAGGT-3'

53BP1 V3 5'-GATCTGAATTCGTTTTTTGTCACTGCCTGCC-3'  
5'-AGTAGGGTCCATGGGCTCCCCAG-3'

WNT5BV1 5'-GATCTGAATTCGACCATTAGCAGGCACCCAGGCCTGTCTTTGGCTCGG  
AAACGGTGGCCCCCAATGTAGCCTAGTTTGAACCTAGGAACTGCAGGACCAGAGAGAT  
TCCACTGGAGCCTGATGGACGGGT-3'

5'-GAGCTCCATGGTCGGCCTCAGCCCTCCCCAGTGCCCTGGGACT  
GACAGTTTCCAGAGTAGGGTTCCTCTGTACCCGTCCATCAGGCTCCAGTGGAATCTC  
TCTGGTCCTGCCAGTTCTAGGTTCAAACCTAGGCTAC-3'

WNT5B V2 5'-GATCTGAATTCTATTCTTCCAAATGGAAACTGCTAATTTTTGAAGC  
AGAAGGTTGACAGCTTCAGTAAGATCTCAAGAGAGCGAGAAGACTGGAATCAGGG-3'

5'-GAGCTCCATGGTCGGCCTCAGCCCTCCCCAGTGCCCTGGGACTGAC  
AGTTTCCAGAGTAGGGTTCCTGATTCCAGTCTTCTCGCTCTCTTTGAGA-3'

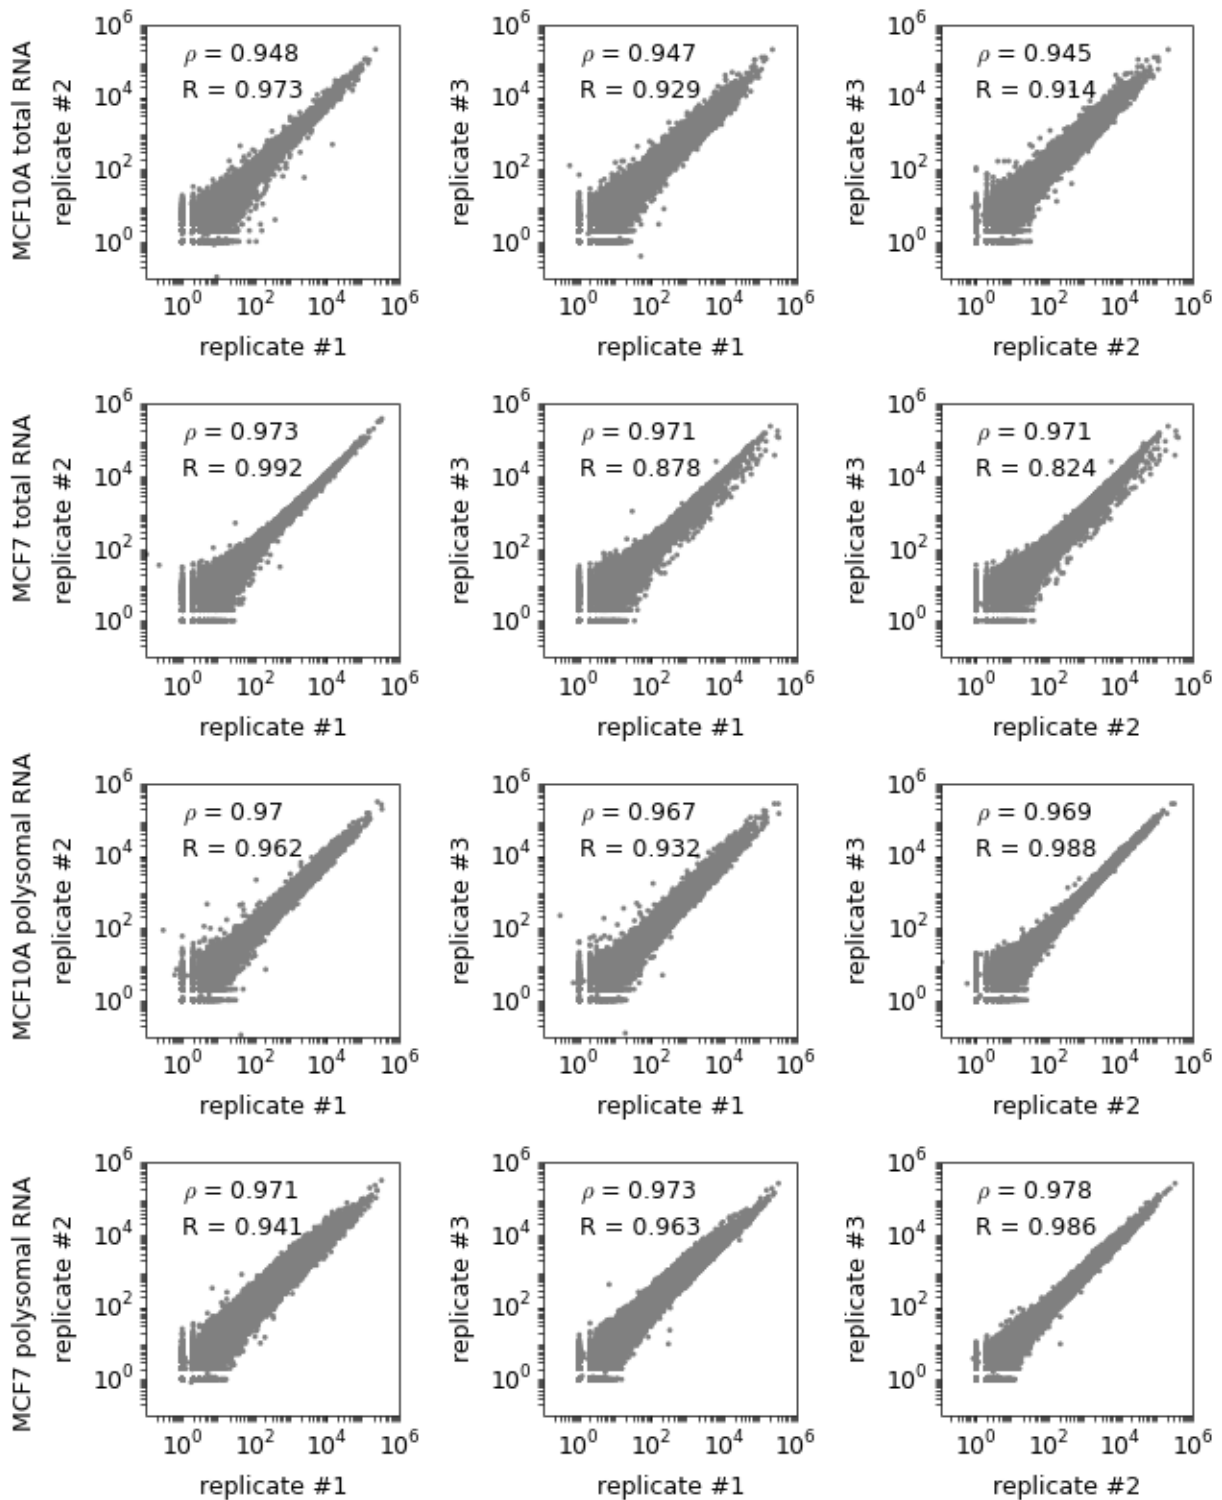

**Figure S1:** Reproducibility of the total and polysomal RNAseq experiments across all replicas. In each scatter plot the Spearman correlation and Pearson correlation coefficient between samples are indicated.

**(A)**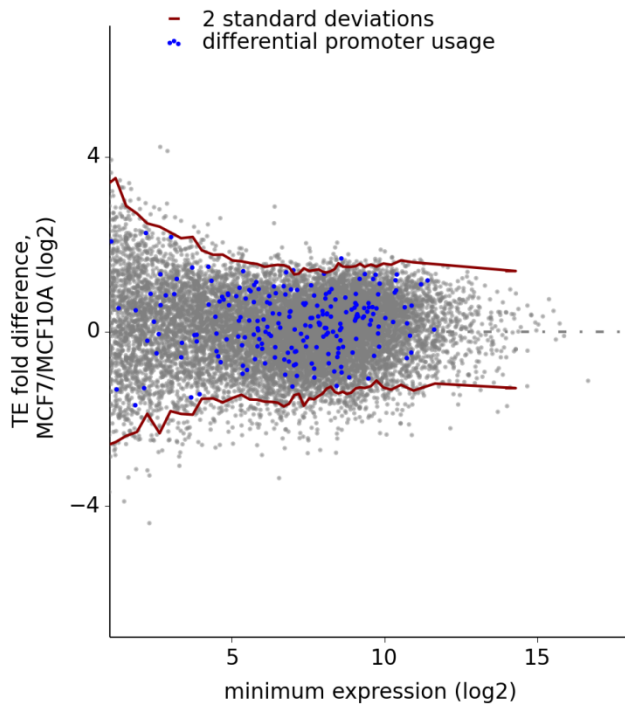**(B)**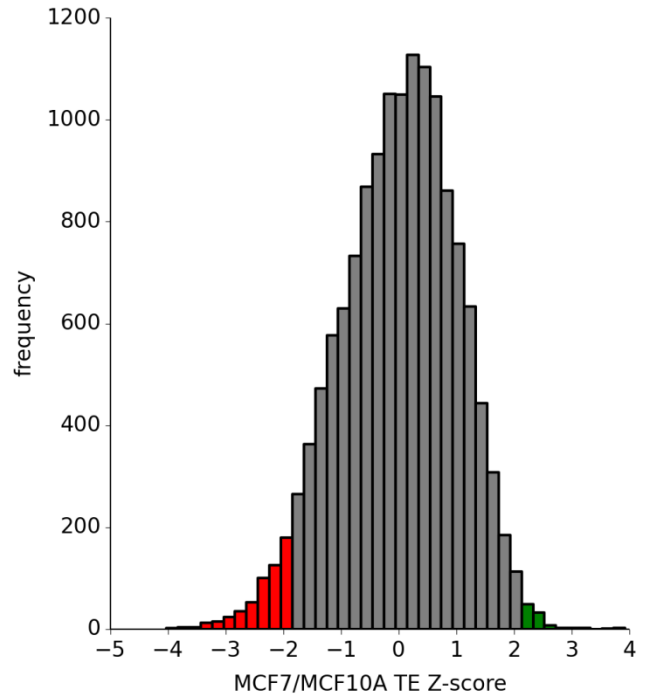

**Figure S2:** (A) MA plot used to carry out Z-score calculation for translation efficiency changes between MCF7 and MCF10A. The level of expression for each gene is obtained from an average of three replicates. Genes identified to have differential promoter usage are shown in blue. (B) Histogram of Z-score obtained for all genes. Those with an absolute Z-score greater than 2 were taken to be differentially translated.

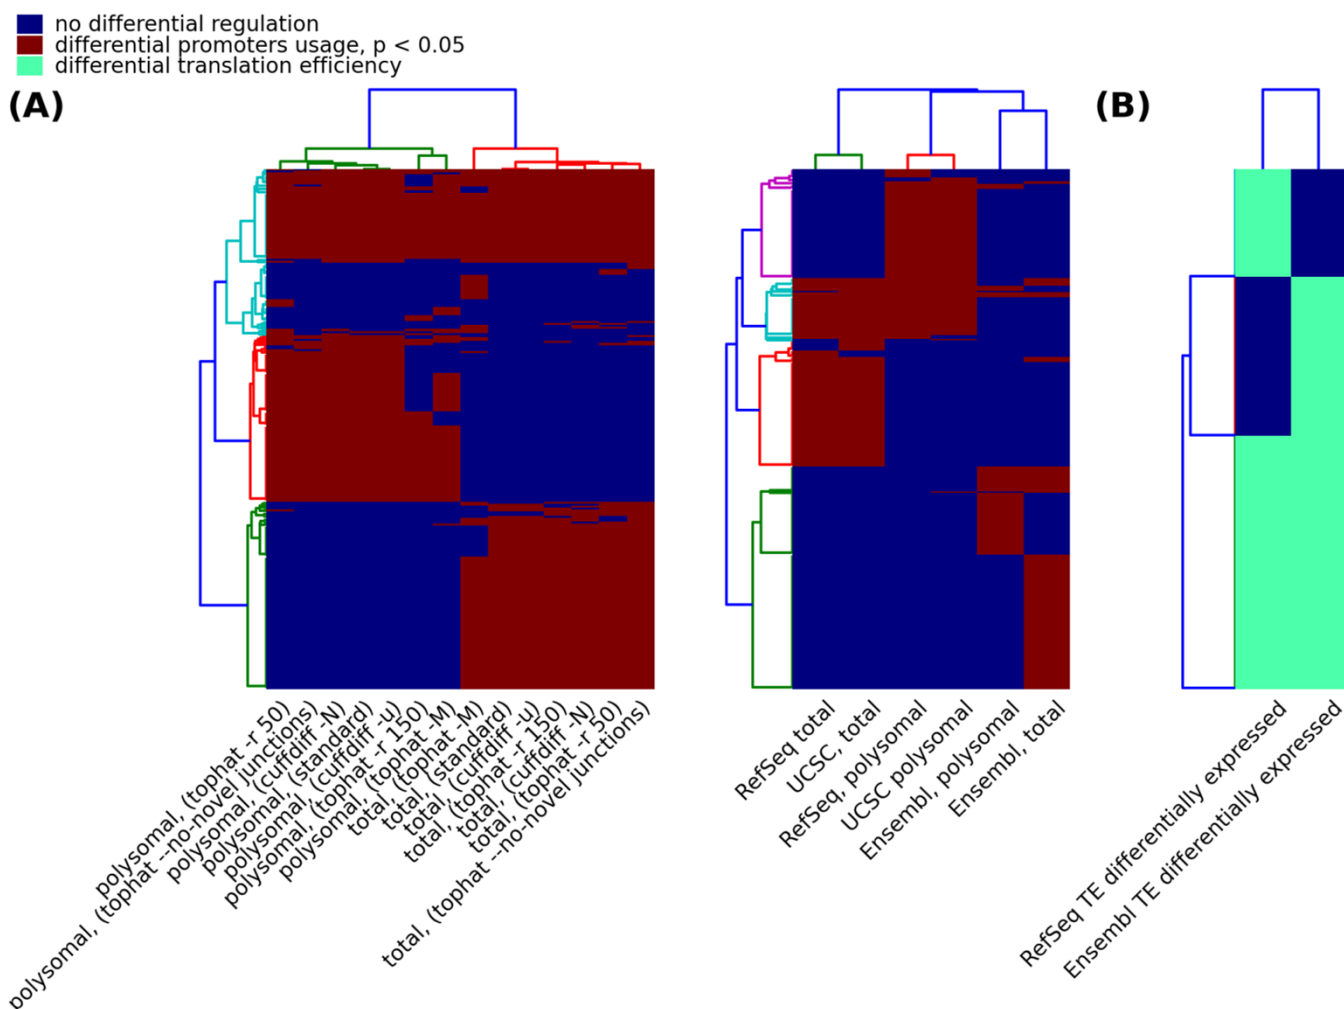

**Figure S3: Identification of differentially expressed genes under various input parameters.**

(A) Heatmaps indicating conditions that genes are identified to have differentially expressed promoter usage in polysomal and total RNAseq using altered parameters for Tophat and Cuffdiff (left) and when reads are aligned with different gene annotations (right). Details of the alignment parameters can be found in the Additional File 4. The genes are found to group together according to the RNAseq sample. (B) A heatmap indicating conditions when genes are identified to be TE differentially expressed with RefSeq and Ensembl gene annotations. The samples are clustered with the cityblock distance metric and "average" linkage criteria.

# (A) CAMKK1

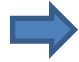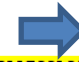

V1 CTGGCCCCAGCGAGGCGGTGGGGCGGGGCGGGGCGGGGCGCGCAGCAGGAGCGAGTGGGGCCGCCCGGGCCCGGGACACTGTCCGCCGGCGCCAGGTTCCCAACAAGGCTACGCAGAAGAACCCTTGAAGCAATGGAGGGGGTCCAGCTGTCTGCTGCCAGGA 180  
V2 ---AGCAGAACAGAGTATGCAATTTGGGAAGCTGTGGTGTG-----GCTGCAGTGGAGA-----GTTCCCAACAAGGCTACGCAGAAGAACCCTTGAAGCAATGGAGGGGGTCCAGCTGTCTGCTGCCAGGA 126  
V3 CTGGCCCCAGCGAGGCGGTGGGGCGGGGCGGGGCGGGGCGCGCAGCAGGAGCGAGTGGGGCCGCCCGGGCCCGGGACACTGTCCGCCGGCGCCAGGTTCCCAACAAGGCTACGCAGAAGAACCCTTGAAGCAATGGAGGGGGTCCAGCTGTCTGCTGCCAGGA 180

V1 TCCTCGGGCAGAGCTGGTAGAACGGGTGGCAGCCATCGATGTGACTCACTTGGAGGAGGCGAGTGGTGGCCAGAGCCCTACTAGAAAACGGTGTGGACCCCCACCACGGGCCAGAGCTGCCTCTGTGATCCCTGGCAGTACTTCAAGACTGCTCCAGCCCGGCTAGCCCTCTCAGCCAG 360  
V2 TCCTCGGGCAGAGCTGGTAGAACGGGTGGCAGCCATCGATGTGACTCACTTGGAGGAGGCGAGTGGTGGCCAGAGCCCTACTAGAAAACGGTGTGGACCCCCACCACGGGCCAGAGCTGCCTCTGTGATCCCTGGCAGTACTTCAAGACTGCTCCAGCCCGGCTAGCCCTCTCAGCCAG 306  
V3 TCCTCGGGCAGAGCTGGTAGAACGGGTGGCAGCCATCGATGTGACTCACTTGGAGGAGGCGAGTGGTGGCCAGAGCCCTACTAGAAAACGGTGTGGACCCCCACCACGGGCCAGAGCTGCCTCTGTGATCCCTGGCAGTACTTCAAGACTGCTCCAGCCCGGCTAGCCCTCTCAGCCAG 360

V1 GAAGCTTTCCCTACAGGAGCGGCCAGCAGGAAGCTATCTGGAGGGCCAGGCTGGGCCTTATGCCACGGGGCCTGCCAGCCACATCTCCCCCGGGCCCTGGCGGAGGGCCACCATCGAGTCCCACCACGTGGCCATCTCAGATGCAGAGGACTGCGTGCAGCTGAACCAAGTACAAGCTGCA 540  
V2 GAAGCTTTCCCTACAGGAGCGGCCAGCAGGAAGCTATCTGGAGGGCCAGGCTGGGCCTTATGCCACGGGGCCTGCCAGCCACATCTCCCCCGGGCCCTGGCGGAGGGCCACCATCGAGTCCCACCACGTGGCCATCTCAGATGCAGAGGACTGCGTGCAGCTGAACCAAGTACAAGCTGCA 486  
V3 GAAGCTTTCCCTACAGGAGCGGCCAGCAGGAAGCTATCTGGAGGGCCAGGCTGGGCCTTATGCCACGGGGCCTGCCAGCCACATCTCCCCCGGGCCCTGGCGGAGGGCCACCATCGAGTCCCACCACGTGGCCATCTCAGATGCAGAGGACTGCGTGCAGCTGAACCAAGTACAAGCTGCA 540

V1 GAGTGAGATTGGCAAGGTTGCCTACGGTGTGGTGGGCTGGCCTACAACGAAAGTGAAGACAGACACTATGCAATGAAAGTCCCTTCCAAAAAGAAAGTTACTGAAGCAGTATGGCTTTCACGTCGCCCTCCCCGAGAGGGTCCCAGGCTGCCAGGGAGGACCGCAAGCAGCTGCT 720  
V2 GAGTGAGATTGGCAAGGTTGCCTACGGTGTGGTGGGCTGGCCTACAACGAAAGTGAAGACAGACACTATGCAATGAAAGTCCCTTCCAAAAAGAAAGTTACTGAAGCAGTATGGCTTTCACGTCGCCCTCCCCGAGAGGGTCCCAGGCTGCCAGGGAGGACCGCAAGCAGCTGCT 666  
V3 GAGTGAGATTGGCAAGGTTGCCTACGGTGTGGTGGGCTGGCCTACAACGAAAGTGAAGACAGACACTATGCAATGAAAGTCCCTTCCAAAAAGAAAGTTACTGAAGCAGTATGGCTTTCACGTCGCCCTCCCCGAGAGGGTCCCAGGCTGCCAGGGAGGACCGCAAGCAGCTGCT 720

V1 GCCCTGGAGCGGGTGTACCAGGAGATTGCCATCCTGAAGAAGCTGGACCAAGTGAATGTGGTCAAACCTGATCGAGTCTGGATGACCCAGCTGAGGACAACCTCTATTTTGG----- 833  
V2 GCCCTGGAGCGGGTGTACCAGGAGATTGCCATCCTGAAGAAGCTGGACCAAGTGAATGTGGTCAAACCTGATCGAGTCTGGATGACCCAGCTGAGGACAACCTCTATTTTGG----- 779  
V3 GCCCTGGAGCGGGTGTACCAGGAGATTGCCATCCTGAAGAAGCTGGACCAAGTGAATGTGGTCAAACCTGATCGAGTCTGGATGACCCAGCTGAGGACAACCTCTATTTTGGCCTCGAGAACCCAGGCCAGAAATACCGAGTTAGATTCAACAAATATCGCCAGCCCCACTCCCTGCT 900

V1 -----TGTTTGACCTCCTGAGAAAAGGGCCCGTCAATGGAAGTGCCTGTGACAAGCCCTTCTCGGAGGAGCAAGCTCGCCTCTACCTGCGGGACGTCATCCTGGGCCCTCGAGTACTTGCATGCCAGAAGATCGTCCA 966  
V2 -----TGTTTGACCTCCTGAGAAAAGGGCCCGTCAATGGAAGTGCCTGTGACAAGCCCTTCTCGGAGGAGCAAGCTCGCCTCTACCTGCGGGACGTCATCCTGGGCCCTCGAGTACTTGCATGCCAGAAGATCGTCCA 912  
V3 TCCCTCGAGCAGCAAGACAGTGGATCCAGTGGGCTGCGCGCTCAGTGTTTGACCTCCTGAGAAAAGGGCCCGTCAATGGAAGTGCCTGTGACAAGCCCTTCTCGGAGGAGCAAGCTCGCCTCTACCTGCGGGACGTCATCCTGGGCCCTCGAGTACTTGCATGCCAGAAGATCGTCCA 1080

V1 CAGGGACATCAAGCCATCCAACCTGCTCCTGGGGATGATGGGCAGTGAAGATCGCCGACTTTGGCGTCAGCAACCAGTTTGGGGGAACGACGCTCAGCTGTCCAGCACGGCGGGAAACCCAGCATTATGGCCCCGAGGGCCATTTCTGATTCGGCCAGAGCTTTCAGTGGGAAGGC 1146  
V2 CAGGGACATCAAGCCATCCAACCTGCTCCTGGGGATGATGGGCAGTGAAGATCGCCGACTTTGGCGTCAGCAACCAGTTTGGGGGAACGACGCTCAGCTGTCCAGCACGGCGGGAAACCCAGCATTATGGCCCCGAGGGCCATTTCTGATTCGGCCAGAGCTTTCAGTGGGAAGGC 1092  
V3 CAGGGACATCAAGCCATCCAACCTGCTCCTGGGGATGATGGGCAGTGAAGATCGCCGACTTTGGCGTCAGCAACCAGTTTGGGGGAACGACGCTCAGCTGTCCAGCACGGCGGGAAACCCAGCATTATGGCCCCGAGGGCCATTTCTGATTCGGCCAGAGCTTTCAGTGGGAAGGC 1260

V1 CTTGGATGATGGGCCACTGGCGTCAAGTGTACTGCTTTGTCTATGGGAAGTGCACATTCATCGACGATTTTCATCCTGGCCCTCCACAGGAAGATCAAGAATGAGCCCGTGGTGTTCCTGAGGAGCCAGAAATCAGCGAGGAGCTCAAGGACCTGATCCTGAAGATGTTAGACAAGAA 1326  
V2 CTTGGATGATGGGCCACTGGCGTCAAGTGTACTGCTTTGTCTATGGGAAGTGCACATTCATCGACGATTTTCATCCTGGCCCTCCACAGGAAGATCAAGAATGAGCCCGTGGTGTTCCTGAGGAGCCAGAAATCAGCGAGGAGCTCAAGGACCTGATCCTGAAGATGTTAGACAAGAA 1272  
V3 CTTGGATGATGGGCCACTGGCGTCAAGTGTACTGCTTTGTCTATGGGAAGTGCACATTCATCGACGATTTTCATCCTGGCCCTCCACAGGAAGATCAAGAATGAGCCCGTGGTGTTCCTGAGGAGCCAGAAATCAGCGAGGAGCTCAAGGACCTGATCCTGAAGATGTTAGACAAGAA 1440

V1 TCCCGAGACGAGAATGGGGTGCAGACATCAAGTTGCACCTTTGGGTGACCAAGAACGGGGAGGAGCCCTTCCCTCGGAGGAGGAGCACTGCACGCTGGTGGAGGTGACAGAGGAGGAGGTTAAGAACTCAGTCAGGCTCATCCCCAGCTGGACCACGGTATCCTGGTGAAGTCCAT 1506  
V2 TCCCGAGACGAGAATGGGGTGCAGACATCAAGTTGCACCTTTGGGTGACCAAGAACGGGGAGGAGCCCTTCCCTCGGAGGAGGAGCACTGCACGCTGGTGGAGGTGACAGAGGAGGAGGTTAAGAACTCAGTCAGGCTCATCCCCAGCTGGACCACGGTATCCTGGTGAAGTCCAT 1452  
V3 TCCCGAGACGAGAATGGGGTGCAGACATCAAGTTGCACCTTTGGGTGACCAAGAACGGGGAGGAGCCCTTCCCTCGGAGGAGGAGCACTGCACGCTGGTGGAGGTGACAGAGGAGGAGGTTAAGAACTCAGTCAGGCTCATCCCCAGCTGGACCACGGTATCCTGGTGAAGTCCAT 1620

V1 GCTGAGGAAGCGTTCCTTTGGGAACCCGTTTGGAGCCCAAGCACGGGAGGAAGAGCGATCCATGTCTGCTCCAGGAACCTACTGGTGAAGAAGGGTTTGGTGAAGGGGGCAAGAGCCAGAGCTCCCCGGCTCCAGGAAGAAGAGGCTGCATCTCGA 1666  
V2 GCTGAGGAAGCGTTCCTTTGGGAACCCGTTTGGAGCCCAAGCACGGGAGGAAGAGCGATCCATGTCTGCTCCAGGAACCTACTGGTGAAGAAGGGTTTGGTGAAGGGGGCAAGAGCCAGAGCTCCCCGGCTCCAGGAAGAAGAGGCTGCATCTCGA 1612  
V3 GCTGAGGAAGCGTTCCTTTGGGAACCCGTTTGGAGCCCAAGCACGGGAGGAAGAGCGATCCATGTCTGCTCCAGGAACCTACTGGTGAAGAAGGGTTTGGTGAAGGGGGCAAGAGCCAGAGCTCCCCGGCTCCAGGAAGAAGAGGCTGCATCTCGA 1711

## (B) CCND3

```
V1 ACCTATCCGC GTGGCGGGGTTGGGGCGGGTCCGCGCGCGGGATGAGCCTCTGGCCTCCGGAGGGTGTACAGGGGTGGAGAGTCAGGCGGGGACCGAACTTGGCTGAGCAG---AGCACCAAGCCCTTTGTCTC---CTCCGCCCTTCCGCACTTCTGCCCAG 175
V2 ---ATTCCAC---GTTGCTACATCGTCCGAGGGCGGGCGCCCTG---TCAGGGAAGCCGGCCCGCGCGCGGGCGGGG---CGGGCTGGGA---TCCGCCCGCAGTGGCCAGGCCAGCCGCGCCCGGCTCTCCGCCCCCTGCGCTGCC--- 150
V3 ---ATTCCAC---GTTGCTACATCGTCCGAGGGCGGGCGCCCTG---TCAGGGAAGCGGCGCCCGCGCGGGCGGGG---CGGGCTGGGA---TCCGCCCGCAGTGGCCAGGCCAGCCGCGCGCCCGGCTCTCCGCCCCCTGCGCTGCC--- 150

V1 CTCGGATCCGCGCGCG---CGCGGACTTTGTAACACTTGGCCACTGAGGGTGGAGACTGGCTCTGTTGGGATCGCCGCGGGGGG---GAGAGGTGCAATCTCTCTCTCCGCGGCTGGTGGTTCGCAACCCACTCCCAAGGCCAGGCTCCGGA---GGCGGGG---ACAGA 346
V2 ---TTGGACTCCGAGCCCGCACTCCCGCCCTGCTGTTCTGCTGCGCGGATGAGCTGCTGTTGCGAAGCACCOCGCGCCCGGGCGGGACCCGCGGCTGCG---GGACCA---CGGTGCTTCCAGAGCTGCTCCGCTGGAGGACCTACTAGTACCCC 320
V3 ---TTGGACTCCGCG---AGCCG---CACTCCGCCCTGC---CTGTTCC---CTGCCGAGTA---TGGAGTGGCT---GTTCCGAGGGCAACC---GGCAAGGCCGCGCG---GGG---CGGG---CGGA 252

V1 GCGCCTGCGAC---CCAGTCCGTGCTCCGGGAGTCA---CTTGACGA---GGAGGTATGTGAGGAGCAGCGCTGTGAGGAGGAAGTCTTCCCCTGGCCATGAACTACCTGGATCGCTACTCTTTCGCTCCCAACCCGAAAGGCGCAGTTGCAG 496
V2 GCGCCTCTTACTTCCAGTCCGTGCGAGCG---GGAGATCAAGCCGACATGCGGAAGATGCTGGCTTACTGGATGCTGGAGGTATGTGAGGAGCAGCGCTGTGAGGAGGAAGTCTTCCCCTGGCCATGAACTACCTGGATCGCTACTCTTTCGCTCCCAACCCGAAAGGCGCAGTTGCAG 499
V3 ---CCGCG---GCTGCTGGG---GGACAGCGTGTCTCCAGAGCTGCTCCGCCCTGG---AGGAGCGCTAGTACCCGCGCTCC---TACTTCCAG 337

V1 CTCCTGGTTCGGCTTGCATGCTGCTGGCCTCCAAGCTCGCGGAGACCAGCCCTGACCATCGAAAACTGTGCACTTACACCGCACCAGCTGTCTCTCCCAGTTCGGGGACTGGGAGGTGCTGGTCTTAGGGAAGCTCAAGTGGGACCTGGCTGCTGTGATTGCATGATTT 676
V2 CTCCTGGTTCGGCTTGCATGCTGCTGGCCTCCAAGCTCGCGGAGACCAGCCCTGACCATCGAAAACTGTGCACTTACACCGCACCAGCTGTCTCTCCCAGTTCGGGGACTGGGAGGTGCTGGTCTTAGGGAAGCTCAAGTGGGACCTGGCTGCTGTGATTGCATGATTT 679
V3 ---TGCTGCGAGGGGAGATCAAGC---CGCACA---CGGAGATGCTG---GCTTACTGATGCTGAGGAGTGGGAGGTGCTGGTCTTAGGGAAGCTCAAGTGGGACCTGGCTGCTGTGATTGCATGATTT 463

V1 CTGGCCTTCATTTGCAACCGGCTCTCTGCCCCGTGACCACAGCCCTTGGTCAAAAAGCATGCCAGACCTTTTGGCCCTCTGTGCTACAGATTATACCTTTGCCATGTACCCCGCATCCATGATCGCCACGGGACGATTGGGGCTGCAAGTGAAGGCCTGGGTGCCTGCTCCATG 856
V2 CTGGCCTTCATTTGCAACCGGCTCTCTGCCCCGTGACCACAGCCCTTGGTCAAAAAGCATGCCAGACCTTTTGGCCCTCTGTGCTACAGATTATACCTTTGCCATGTACCCCGCATCCATGATCGCCACGGGACGATTGGGGCTGCAAGTGAAGGCCTGGGTGCCTGCTCCATG 859
V3 CTGGCCTTCATTTGCAACCGGCTCTCTGCCCCGTGACCACAGCCCTTGGTCAAAAAGCATGCCAGACCTTTTGGCCCTCTGTGCTACAGATTATACCTTTGCCATGTACCCCGCATCCATGATCGCCACGGGACGATTGGGGCTGCAAGTGAAGGCCTGGGTGCCTGCTCCATG 643

V1 TCCGGGATGAGCTCACAGAGCTGCTGGCAGGATCACTGGCACTGAAGTGGACTGCTGCGGGCCTGTCAAGGACAGATCGAAGCTGCACTCAGGAGAGCCTCAGGGAAGCCTCTCAGACAGCTCCAGCCAGCCGAAAGCCCCGGGGCTCCAGCAGCCAAGGCCAGCCAG 1036
V2 TCCGGGATGAGCTCACAGAGCTGCTGGCAGGATCACTGGCACTGAAGTGGACTGCTGCGGGCCTGTCAAGGACAGATCGAAGCTGCACTCAGGAGAGCCTCAGGGAAGCCTCTCAGACAGCTCCAGCCAGCCGAAAGCCCCGGGGCTCCAGCAGCCAAGGCCAGCCAG 1039
V3 TCCGGGATGAGCTCACAGAGCTGCTGGCAGGATCACTGGCACTGAAGTGGACTGCTGCGGGCCTGTCAAGGACAGATCGAAGCTGCACTCAGGAGAGCCTCAGGGAAGCCTCTCAGACAGCTCCAGCCAGCCGAAAGCCCCGGGGCTCCAGCAGCCAAGGCCAGCCAG 823

V1 ACCAGCACTCCTACAGATGTCACAGCCATACACCTGTAG 1075
V2 ACCAGCACTCCTACAGATGTCACAGCCATACACCTGTAG 1078
V3 ACCAGCACTCCTACAGATGTCACAGCCATACACCTGTAG 862
```

## (C) WNT5B

```
V1 GACCATTAGCAGGCACCAGGCGTGTCTTGGCTCGGAAACGGTGGCCCCCAATGTAGCCTAGTTTGAACCTTAGGAAGCTG---CAGGACAGAGAGATTCCACTGGAGCCTGATGGACGGTGA---CAGAGGGAACCCACTACTGGAACCTGTGAGTCCCAGGGCAGTGGGGAGGGCTGAGGC 178
V2 ---TATTCTCCAAATGGAAATGCTAAAT---TTTTGAAGC---AGAAGGTTGACAGCTTCAGTAAAGATCAAGAGAGCGA---GACTG---GATCAGGGAACCCACTACTGGAACCTGTGAGTCCCAGGGCAGTGGGGAGGGCTGAGGC 140

V1 CGACCATGCCAGCCTGCTGCTGCTGTTTACGGCTGCTCTGCTGTCCAGCTGGGCTCAGCTTCTGCAGACGCCAATCCTGGTGGTATTAGCTTTGAACCCGGTGCAGAGACCCGAGATGTTTATCATCGGTGCCAGCCCGTGTGCAGTCACTCCCGGGCTCTCCCTGGCCAG 358
V2 CGACCATGCCAGCCTGCTGCTGCTGTTTACGGCTGCTCTGCTGTCCAGCTGGGCTCAGCTTCTGCAGACGCCAATCCTGGTGGTATTAGCTTTGAACCCGGTGCAGAGACCCGAGATGTTTATCATCGGTGCCAGCCCGTGTGCAGTCACTCCCGGGCTCTCCCTGGCCAG 320

V1 GGAAGCTGTGCCAATTTGACCAGGAGCACATGGCCTACATAGGGGAGGGAGCCAAAGACTGGCATCAAGGAATGCCAGCACCAGTTCCGGCAGCGGGCGTGAATTTGACAGCAGCGGGAACACGCATCTGTCTTTGGGAGAGTCAATGCAGATAGGCAGCCGAGAGCCGCTTACCCACG 538
V2 GGAAGCTGTGCCAATTTGACCAGGAGCACATGGCCTACATAGGGGAGGGAGCCAAAGACTGGCATCAAGGAATGCCAGCACCAGTTCCGGCAGCGGGCGTGAATTTGACAGCAGCGGGAACACGCATCTGTCTTTGGGAGAGTCAATGCAGATAGGCAGCCGAGAGACCCGCTTACCCACG 500

V1 CGGTGAGCGCCCGGGCGTGGTCAACGCCATCAGCCGGCTGCGCGGAGGGCGAGCTCTCCACTCGGGCTGCAAGCGGACGGCGCGGCCAAGGACTGCCCCGGGACTGGCTGTGGGGCGGTGTGGGGACAACGTGGAGTACGGCTACCGCTTCGCCAAGGAGTTTGTGGATGCC 718
V2 CGGTGAGCGCCCGGGCGTGGTCAACGCCATCAGCCGGCTGCGCGGAGGGCGAGCTCTCCACTCGGGCTGCAAGCGGACGGCGCGGCCAAGGACTGCCCCGGGACTGGCTGTGGGGCGGTGTGGGGACAACGTGGAGTACGGCTACCGCTTCGCCAAGGAGTTTGTGGATGCC 680

V1 GGGAGCGAGAGAAGAACTTTGCCAAAGGATCAGAGGAGCAGGGCCGGTGTCTATGAACCTGCAAAAACACGAGCCGGTGCAGGGCTGTGATATAAGATGGCAGAGTACCTGCAAAATGCCAGCGCTCTCGGGTCTGCAAGCTTACTGGCTGCAAGCTGCTGGCTGCAAGCTGCCCGAGTCC 898
V2 GGGAGCGAGAGAAGAACTTTGCCAAAGGATCAGAGGAGCAGGGCCGGTGTCTATGAACCTGCAAAAACACGAGCCGGTGCAGGGCTGTGATATAAGATGGCAGAGTACCTGCAAAATGCCAGCGCTCTCGGGTCTGCAAGCTTACTGGCTGCAAGCTGCTGGCTGCAAGCTGCCCGAGTCC 860

V1 GCAAGGTCGGGGACCGGCTGAGGAGAAAGTACGACAGCGCGCCGCCATGCGCGCTCACCCGAAAGGCGGGCTGGAGCTGGTCAACAGCCGCTTACCCAGCCACCCCGGAGGACTGGTCTATGTGAGCCCCAGCCCCGACTACTGCCTGCGCAACGAGAGCACGGGCTCCCTGGGCA 1078
V2 GCAAGGTCGGGGACCGGCTGAGGAGAAAGTACGACAGCGCGCCGCCATGCGCGCTCACCCGAAAGGCGGGCTGGAGCTGGTCAACAGCCGCTTACCCAGCCACCCCGGAGGACTGGTCTATGTGAGCCCCAGCCCCGACTACTGCCTGCGCAACGAGAGCACGGGCTCCCTGGGCA 1040

V1 GCGAGGGCCGCTCTGCAACAAGACTCGGAGGGCATGGATGGCTGTAGCTCATGTCTGCGGGCGTGGCTACAACCAAGTCAAGAGCGTGCAGGTGGAGCGCTGCCACTGCAAGTTCCACTGGTGGCTTCTGTCAGGTGTAAAGAGTGCACGGAGATCGTGGACCAGTACATCTGTA 1258
V2 GCGAGGGCCGCTCTGCAACAAGACTCGGAGGGCATGGATGGCTGTAGCTCATGTCTGCGGGCGTGGCTACAACCAAGTCAAGAGCGTGCAGGTGGAGCGCTGCCACTGCAAGTTCCACTGGTGGCTTCTGTCAGGTGTAAAGAGTGCACGGAGATCGTGGACCAGTACATCTGTA 1220

V1 AATAG 1263
V2 AATAG 1225
```

# (D) CLDN7

|    |                                                                                                                                                                                       |      |
|----|---------------------------------------------------------------------------------------------------------------------------------------------------------------------------------------|------|
| V1 | GGAAAAAAGGAGAGCAGCGGGTGGGGGCGAAAGCAGGGCCGAGGAGAGAGCCTTTGGACAGAACCCGGCGGGGAAAGGGCGGGCCGAGGCTTGTACGGGGCGCCCGCAGCGTCCCAGGCGCACCTGTTGGGAAGAAAGGAGGGGCTTCCCGGTGTTTCGAGGGAAATCCAGTCCG       | 180  |
| V2 | -----TCCAGTTAG-----                                                                                                                                                                   | 9    |
| V3 | GGAAAAAAGGAGAGCAGCGGGTGGGGGCGAAAGCAGGGCCGAGGAGAGAGCCTTTGGACAGAACCCGGCGGGGAAAGGGCGGGCCGAGGCTTGTACGGGGCGCCCGCAGCGTCCCAGGCGCACCTGTTGGGAAGAAAGGAGGGGCTTCCCGGTGTTTCGAGGGAAATCCAGTCCG       | 180  |
| V1 | GAGGGGCTGACTCGGAGCTTGGGACTCCTGGGAGCCACCGCCTCCTCCCCAGCGGCGTCAAACCCGGCAAGCGAAGGGGCGTGAACCTGGTGTCTCAGGTTTCTTCTCCTCACCTGGGCAAGGAGGGTGGGGGCCAGACTTCCGGTTCAGGTGAGTGTCCCTTCGGTGACGTGAC       | 360  |
| V2 | GAG-----CCITGATG-----CGGAGGGG-----                                                                                                                                                    | 29   |
| V3 | GAGGGGCTGACTCGGAGCTTGGGACTCCTGGGAGCCACCGCCTCCTCCCCAGCGGCGTCAAACCCGGCAAGCGAAGGGGCGTGAACCTGGTGTCTCAGGTTTCTTCTCCTCACCTGGGCAAGGAGGGTGGGGGCCAGACTTCCGGTTCAGGTGAGTGTCCCTTCGGTGACGTGAC       | 360  |
| V1 | GTCACTCTCGGCGCCCTCCGGTCCCGCCTCCCGCTCCCGCGCTCCCGGGGCGCGGGGCGCGCCCGCCAGCGCCCTACATATACTCAGGTGCGCCCCACCTGTCCGCGCGCACCTGTGGCTCACCTCCGAGCCACCTCTGCTGCGCACCGCAGCCCTCGGACCTACAGCCCAAGGATA     | 540  |
| V2 | -----ACAG-----                                                                                                                                                                        | 33   |
| V3 | GTCACTCTCGGCGCCCTCCGGTCCCGCCTCCCGCTCCCGCGCTCCCGGGGCGCGGGGCGCGCCCGCCAGCGCCCTACATATACTCAGGTGCGCCCCACCTGTCCGCGCGCACCTGTGGCTCACCTCCGAGCCACCTCTGCTGCGCACCGCAGCCCTCGGACCTACAGCCCAAGGATA     | 540  |
| V1 | TTTGGGACTTGC CGGCGCTCAGAAAACGCGCCAGACGCGCCCTCCACCTTTTGTTCCTAGGGTGC CGGAGAGCGCCGGAGGGAACCGCCTGGCCTTCGGGACCAACCAATTTGTCTGGAACCCCTCCCGCGTATCCTACTCCCTGTGCCGCGAGGCCATCGCTTCAGTGGAGG       | 720  |
| V2 | -----TGGTGC CGGAGAGCGCCGGAGGGAACCGCCTGGCCTTCGGGACCAACCAATTTGTCTGGAACCCCTCCCGCGTATCCTACTCCCTGTGCCGCGAGGCCATCGCTTCAGTGGAGG                                                              | 153  |
| V3 | TTTGGGACTTGC CGGCGCTCAGAAAACGCGCCAGACGCGCCCTCCACCTTTTGTTCCTAGGGTGC CGGAGAGCGCCGGAGGGAACCGCCTGGCCTTCGGGACCAACCAATTTGTCTGGAACCCCTCCCGCGTATCCTACTCCCTGTGCCGCGAGGCCATCGCTTCAGTGGAGG       | 720  |
| V1 | GGTCGATTTGTGTAGTTTGGTGACAAGATTTGCATTCACCTGGCCAAACCCCTTTTGTCTCTTTGGGTGACCGGAAAACCTCCACCTCAAGTTTTCTTTTGGGGGCTGCCCCCAAGTGTGCTTTGTTTACTGTAGGGTCTCCCGCGCGGCGCCCAAGTGTTCCTGAGGGCGG          | 900  |
| V2 | GGTCGATTTGTGTAGTTTGGTGACAAGATTTGCATTCACCTGGCCAAACCCCTTTTGTCTCTTTGGGTGACCGGAAAACCTCCACCTCAAGTTTTCTTTTGGGGGCTGCCCCCAAGTGTGCTTTGTTTACTGTAGGGTCTCCCGCGCGGCGCCCAAGTGTTCCTGAGGGCGG          | 333  |
| V3 | GGTCGATTTGTGTAGTTTGGTGACAAGATTTGCATTCACCTGGCCAAACCCCTTTTGTCTCTTTGGGTGACCGGAAAACCTCCACCTCAAGTTTTCTTTTGGGGGCTGCCCCCAAGTGTGCTTTGTTTACTGTAGGGTCTCCCGCGCGGCGCCCAAGTGTTCCTGAGGGCGG          | 900  |
| V1 | AAATGGCCAATTCGGGCTGCAGTTGCTGGGCTTCTCCATGGCCCTGCTGGGCTGGGTGGGTCTGGTGGCCTGCACCGCCATCCCGCAGTGGCAGATGAGCTCCTATGCGGGTGACAACATCATCACGGCCAGGCCATGTACAAGGGGCTGGATGGACTGCGTCAAGCAGAGCACGG      | 1080 |
| V2 | AAATGGCCAATTCGGGCTGCAGTTGCTGGGCTTCTCCATGGCCCTGCTGGGCTGGGTGGGTCTGGTGGCCTGCACCGCCATCCCGCAGTGGCAGATGAGCTCCTATGCGGGTGACAACATCATCACGGCCAGGCCATGTACAAGGGGCTGGATGGACTGCGTCAAGCAGAGCACGG      | 513  |
| V3 | AAATGGCCAATTCGGGCTGCAGTTGCTGGGCTTCTCCATGGCCCTGCTGGGCTGGGTGGGTCTGGTGGCCTGCACCGCCATCCCGCAGTGGCAGATGAGCTCCTATGCGGGTGACAACATCATCACGGCCAGGCCATGTACAAGGGGCTGGATGGACTGCGTCAAGCAGAGCACGG      | 1080 |
| V1 | GGATGATGAGCTGCAAAATGTACGACTCGGTGCTCGCCCTGTCCCGGCCCTTCAGGCCACTCGAGCCCTAATGGTGGTCTCCCTGGTGTGGGCTTCTGGCCATGTTTGTGGCCACGATGGGCATGAAGTGCACGCGCTGTGGGGAGACGCAAAAGTGAAGAAGGCCCGTATAGCCA      | 1260 |
| V2 | GGATGATGAGCTGCAAAATGTACGACTCGGTGCTCGCCCTGTCCCGGCCCTTCAGGCCACTCGAGCCCTAATGGTGGTCTCCCTGGTGTGGGCTTCTGGCCATGTTTGTGGCCACGATGGGCATGAAGTGCACGCGCTGTGGGGAGACGCAAAAGTGAAGAAGGCCCGTATAGCCA      | 693  |
| V3 | GGATGATGAGCTGCAAAATGTACGACTCGGTGCTCGCCCTGTCCCGGCCCTTCAGGCCACTCGAGCCCTAATGGTGGTCTCCCTGGTGTGGGCTTCTGGCCATGTTTGTGGCCACGATGGGCATGAAGTGCACGCGCTGTGGGGAGACGCAAAAGTGAAGAAGGCCCGTATAGCCA      | 1260 |
| V1 | TGGGTGGAGGCATAATTTTTCATCGTGGCAGGTCTTCCCGCCTTGGTAGCTTGTCTCTGGTATGGCCATCAGATTGTACAGACTTTTATAACCCCTTGTATCCCTACCAACATTAAGTATGAGTTTGGCCCTGCCATCTTTATTGGCTGGGCAGGGTCTGCCCTAGTCACTCCTGGAGGTG | 1440 |
| V2 | TGGGTGGAGGCATAATTTTTCATCGTGGCAGGTCTTCCCGCCTTGGTAGCTTGTCTCTGGTATGGCCATCAGATTGTACAGACTTTTATAACCCCTTGTATCCCTACCAACATTAAGTATGAGTTTGGCCCTGCCATCTTTATTGGCTGGGCAGGGTCTGCCCTAGTCACTCCTGGAGGTG | 873  |
| V3 | TGGGTGGAGGCATAATTTTTCATCGTGGCAG-----GTATGAGTTTGGCCCTGCCATCTTTATTGGCTGGGCAGGGTCTGCCCTAG-----                                                                                           | 1340 |
| V1 | CACTGCTCTCCTGTTCTGCTGCTGGGAATGAGAGCAAGGCTGGGTACCGTGTACCCCGCTCTTACCCTAAGTCCAACTCTTCCAAGGAGTATGTGTGA                                                                                    | 1538 |
| V2 | CACTGCTCTCCTGTTCTGCTGCTGGGAATGAGAGCAAGGCTGGGTACCGTGTACCCCGCTCTTACCCTAAGTCCAACTCTTCCAAGGAGTATGTGTGA                                                                                    | 971  |
| V3 | -----                                                                                                                                                                                 |      |



### (E) 53BP1

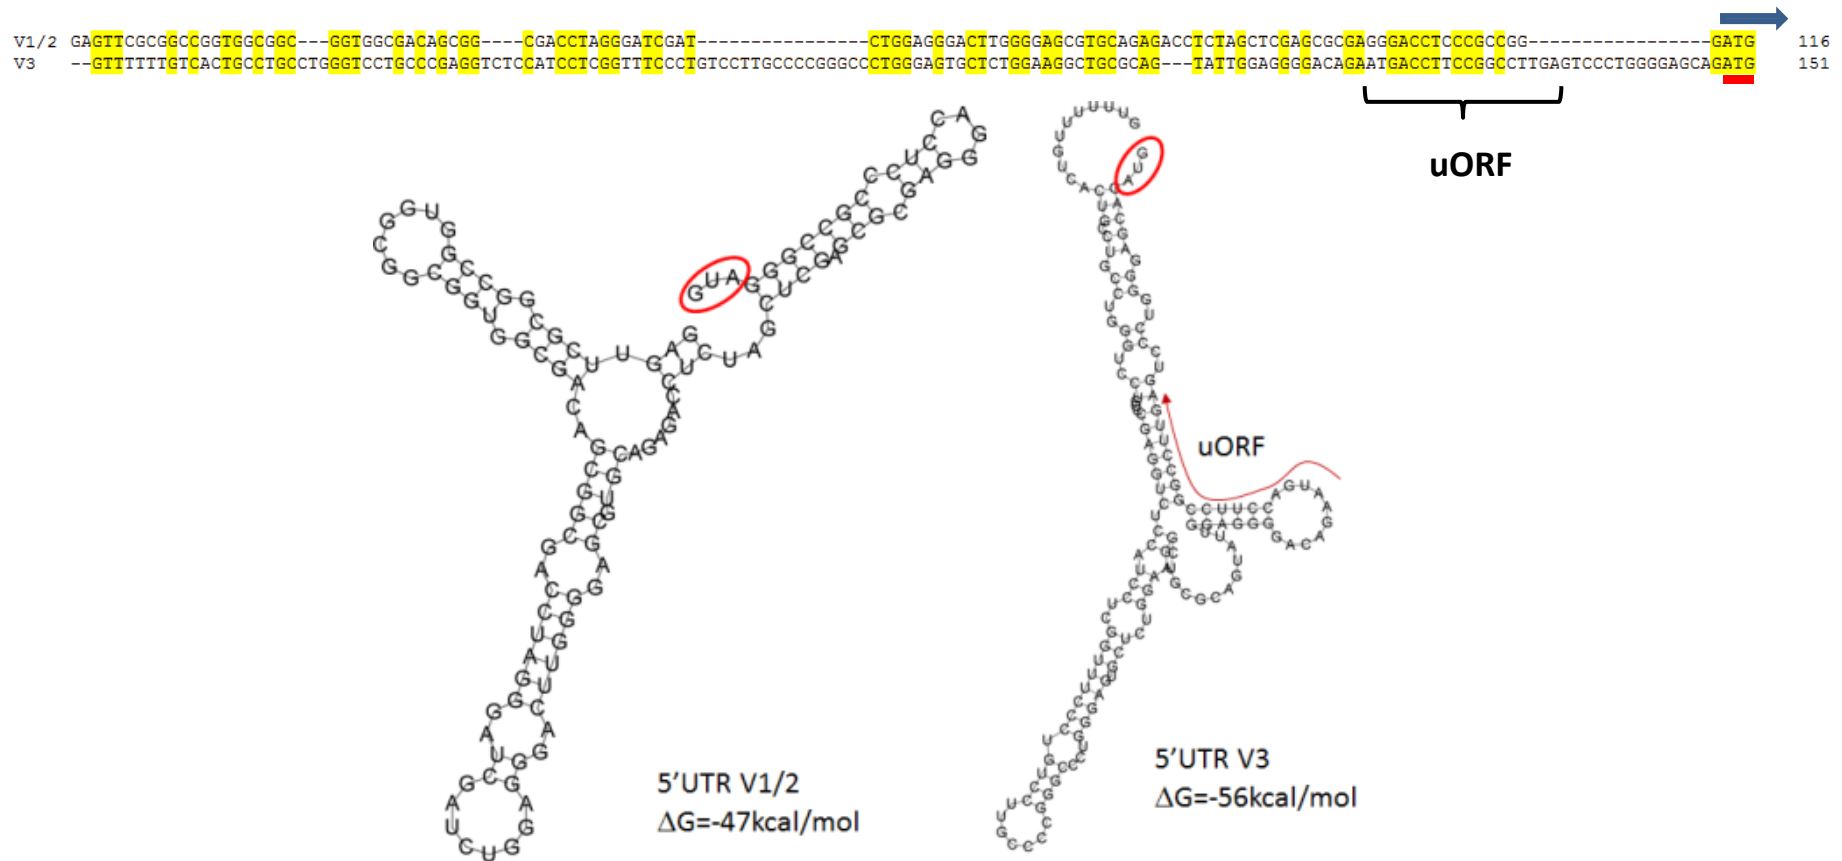

**Figure S4:** A-D. Sequence alignments of the different transcript variants for the genes *CAMKK1*, *CCND3*, *WNT5B* and *CLDN7*. For clarity only the 5'TLs and ORFs have been included in the alignments. The AUG start codons are highlighted (red line and blue arrow). Gaps in the alignment within the principle ORF arise due to alternative splicing. E. Alignment of the two TLs for the gene 53BP1. The uORF in V3 is indicated. In the lower image the two TLs have been folded. The AUG start codon is circled, the position of the uORF within the RNA structure and the minimum free energies are indicated

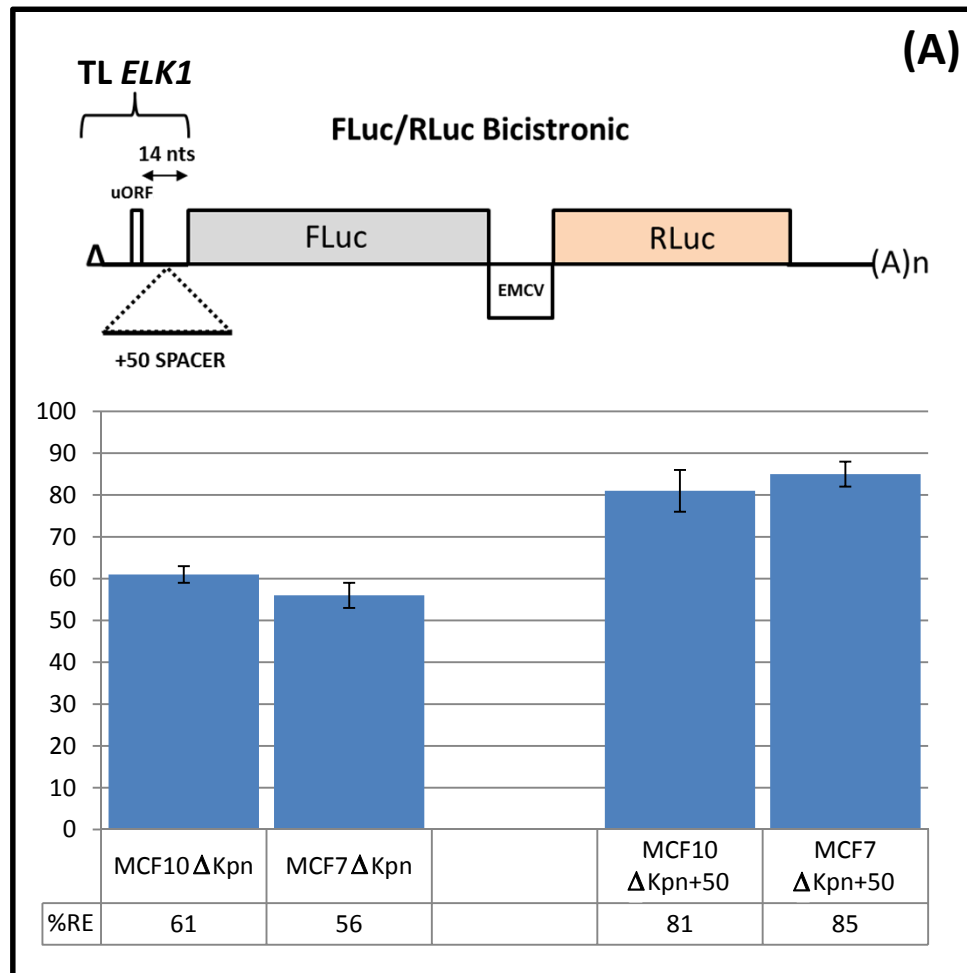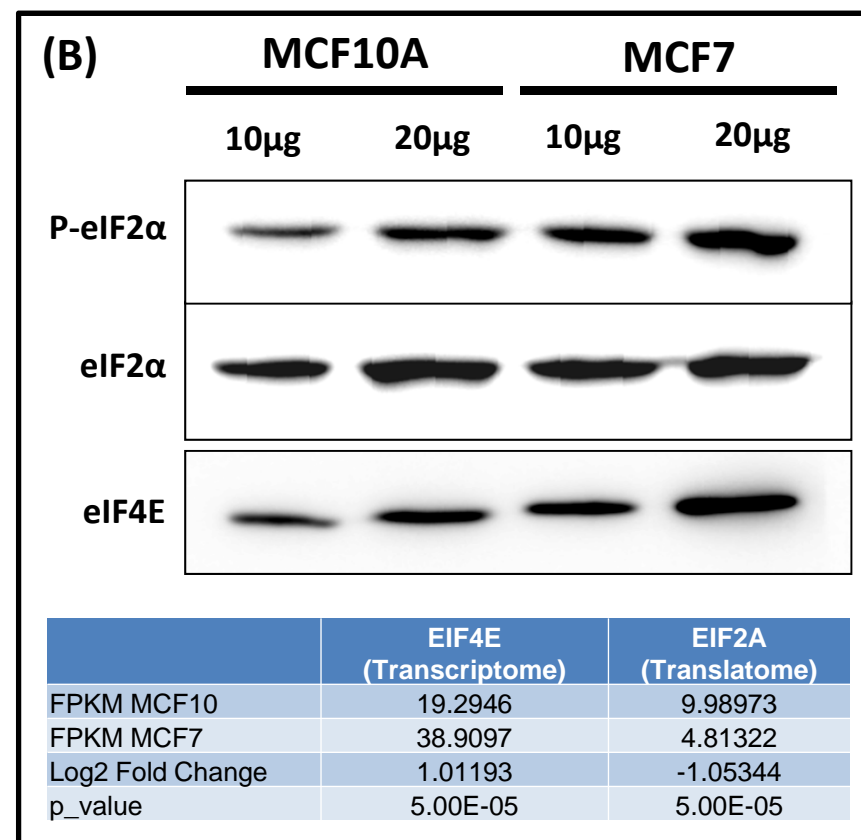

**Figure S5: A.** The upper image is a schematic representation of a Fluc-EMCV-RLuc bicistronic vector carrying the TL region of the *ELK1* gene. This carries a short uORF (2 codons) 14 nts upstream of the AUG<sup>Fluc</sup>. In a second vector the UGA stop codon in the uORF was changed to UGC. As a consequence the uORF now overlaps that of Fluc. These constructs were transfected into both MCF7 and MCF10A cells. Comparison of the normalised Fluc/RLuc values for the UGA and UGC constructs gives a measure of reinitiation events (RE) occurring at the AUG<sup>Fluc</sup> (lower image). The frequency of RE events was significantly increased by the insertion of a 50nts spacer between the uORF and the AUG<sup>Fluc</sup> (for further details see Rahim et al<sup>23</sup>). **B.** Immunoblots showing steady-state levels of eIF4E, eIF2 $\alpha$  and phospho-eIF2 $\alpha$  in MCF7 and MCF10A cells. Two quantities of cell extract have been loaded onto the SDS-PAGE gel. In the lower panel, the FPKM values for both genes, extracted from the transcriptome and translatome analysis, are indicated.

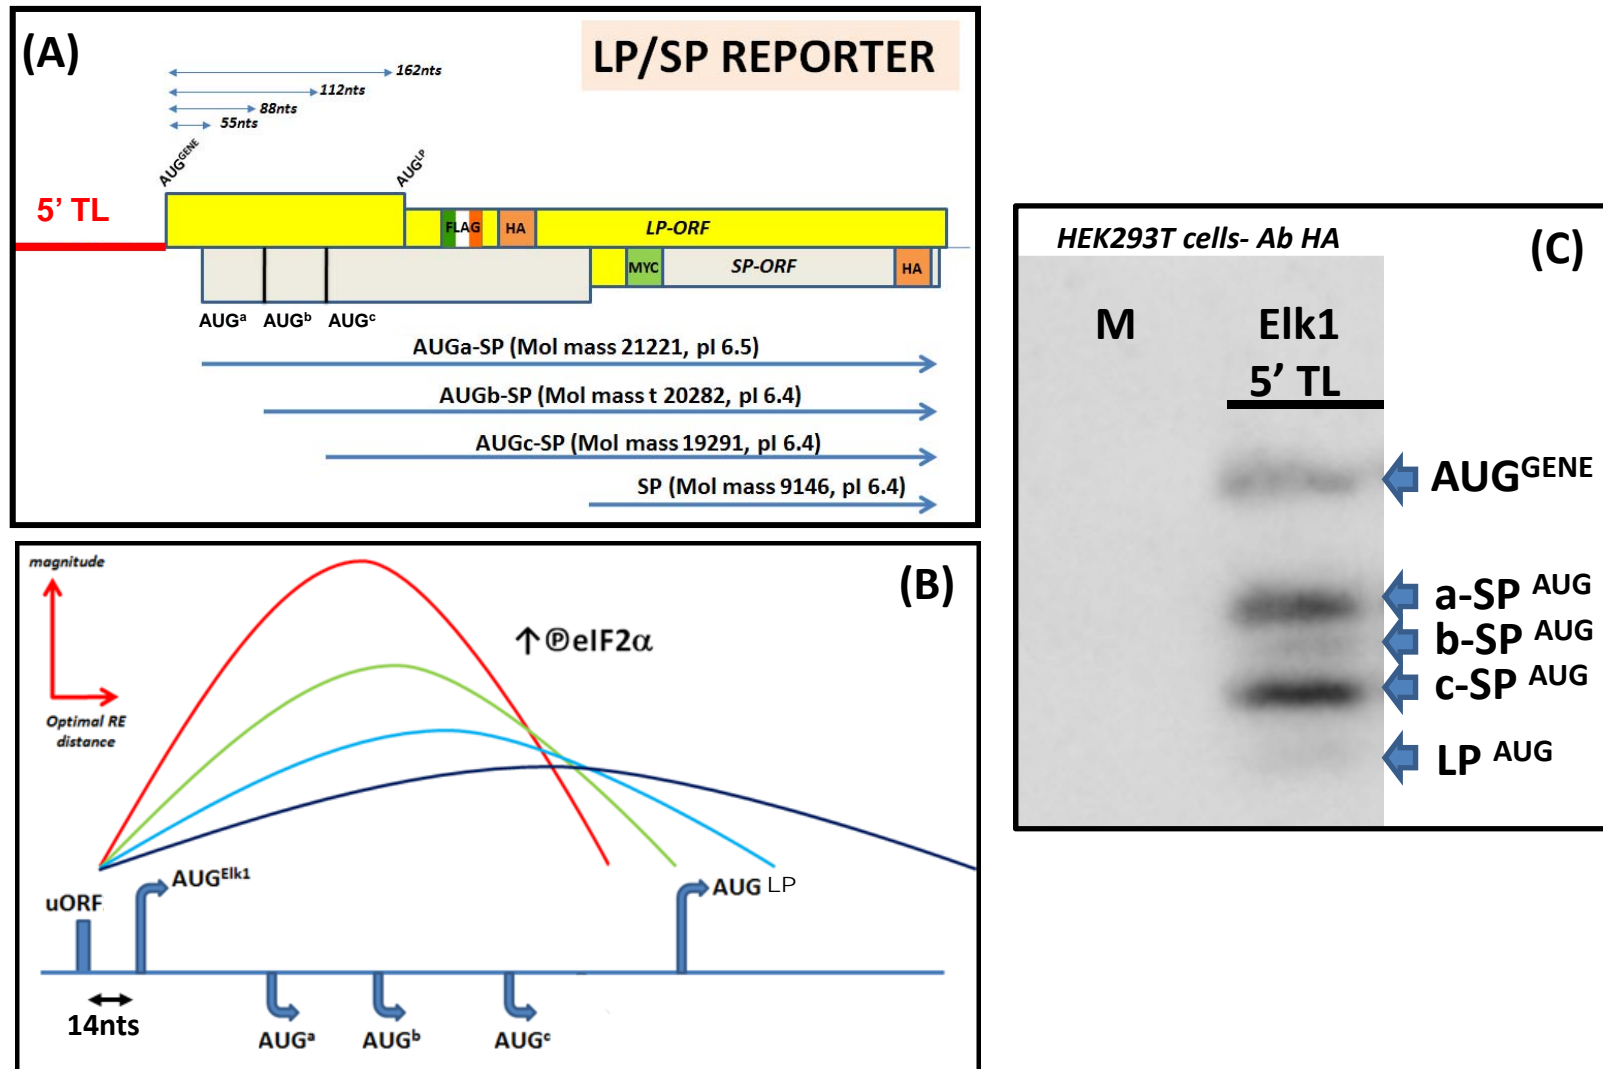

**Figure S6: A.** Detailed schematic representation of the LP/SP reporter system. The fused TL is indicated in red. The positions of the various AUG codons, the molecular mass of the protein products and the positioning of the epitope tags are all indicated. **B.** A simple model describing what occurs as phospho-eIF2 $\alpha$  levels rise, and consequently TC levels fall, with regards to the readout from the LP/SP reporter. Reduced TC levels globally down-regulate translation but in parallel they displace reinitiation events mediated by the small uORF to the 3'. **C.** An immunoblot developed using the anti-HA Ab. The gel was loaded with a HEK293T cell extract in which an LP/SP reporter carrying the TL of the gene ELK1 was expressed. The protein products are indicated. M indicates a mock transfected control (see Rahim et al<sup>23</sup>)

| <b>GROWTH CONTROL, ONCOGENES, TUMOUR SUPPRESSORS, APOPTOSIS</b> |                                                                                                                                                                                                                |
|-----------------------------------------------------------------|----------------------------------------------------------------------------------------------------------------------------------------------------------------------------------------------------------------|
| UP REGULATED                                                    |                                                                                                                                                                                                                |
| <b>TGFB3L</b>                                                   | Transforming Growth Factor-Beta Receptor Type III-Like Protein . Binds to various members of the TGF-beta superfamily of ligands via its core protein, and bFGF via its heparan sulfate chains.                |
| <b>MAP3K14</b>                                                  | It participates in an NF-kappaB-inducing signalling cascade                                                                                                                                                    |
| <b>FGFR1</b>                                                    | Fibroblast Growth Factor Receptor-Like 1. A marked difference between this gene product and the other family members is its lack of a cytoplasmic tyrosine kinase domain.                                      |
| <b>SHB</b>                                                      | Src Homology 2 Domain Containing Adaptor Protein B: May play a role in apoptosis.                                                                                                                              |
| <b>IKBKE</b>                                                    | Inducible I Kappa-B Kinase. IKBKE has also been identified as a breast cancer (MIM 114480) oncogene and is amplified and overexpressed in over 30% of breast carcinomas and breast cancer cell lines.          |
| <b>ARAF</b>                                                     | v-raf murine sarcoma oncogene homolog: May also regulate the TOR signaling cascade.                                                                                                                            |
| <b>PDLM2</b>                                                    | PDZ And LIM Domain 2: The encoded protein is also a putative tumor suppressor protein.                                                                                                                         |
| DOWN REGULATED                                                  |                                                                                                                                                                                                                |
| <b>FAM60A</b>                                                   | Family With Sequence Similarity 60, Member A: Subunit of the Sin3 deacetylase complex (Sin3/HDAC), this subunit is important for the repression of genes encoding components of the TGF-beta signaling pathway |
| <b>CD109</b>                                                    | CD109 Molecule: Modulates negatively TGFB1 signaling in keratinocytes (see Chen et al., 2001)                                                                                                                  |
| <b>LIN9</b>                                                     | Lin-9 Homolog: This gene encodes a tumor suppressor protein that inhibits DNA synthesis and oncogenic transformation through association with the retinoblastoma 1 protein.                                    |
| <b>CDC73</b>                                                    | Cell Division Cycle 73: Tumor suppressor probably involved in transcriptional and post-transcriptional control pathways.                                                                                       |
| DNA REPAIR, CELL CYCLE                                          |                                                                                                                                                                                                                |
| DOWN REGULATED                                                  |                                                                                                                                                                                                                |
| <b>XRCC5</b>                                                    | DNA repair protein- implicated in breast cancer                                                                                                                                                                |
| <b>XRCC4</b>                                                    | DNA repair protein                                                                                                                                                                                             |
| <b>CKS2</b>                                                     | CDC28 Protein Kinase Regulatory Subunit 2: binds to the catalytic subunit of the cyclin dependent kinases and is essential for their biological function.                                                      |
| <b>RAD21</b>                                                    | RAD21 Homolog: may play a role in spindle pole assembly during mitosis. Also plays a role in apoptosis, via its cleavage by caspase-3/CASP3 or caspase-7/CASP7.                                                |
| <b>CCNC</b>                                                     | Cyclin C: Component of the Mediator complex (see MED23). Binds to and activates CDK8 that phosphorylates the CTD (C-terminal domain) of the large subunit of RNA Pol II                                        |
| <b>NPEPPS</b>                                                   | Aminopeptidase Puromycin Sensitive: involved in proteolytic events regulating the cell cycle.                                                                                                                  |
| <b>POLK</b>                                                     | DNA Polymerase Kappa: DNA polymerase specifically involved in DNA repair.                                                                                                                                      |
| <b>CENPK</b>                                                    | Centromere Protein K: involved in assembly of kinetochore proteins, mitotic progression and chromosome segregation.                                                                                            |
| <b>CENPQ</b>                                                    | Centromere Protein Q: involved in assembly of kinetochore proteins, mitotic progression and chromosome segregation.                                                                                            |
| <b>NBN</b>                                                      | Nijmegen Breakage Syndrome 1 (Nibrin): Component of the MRE11-RAD50-NBN (MRN complex) which plays a critical role in the cellular response to DNA damage and the maintenance of chromosome integrity.          |
| <b>CDK1</b>                                                     | Cyclin-Dependent Kinase 1: Plays a key role in the control of the eukaryotic cell cycle.                                                                                                                       |
| <b>MNAT1</b>                                                    | CDK-Activating Kinase Assembly Factor MAT1: Involved in cell cycle control and in RNA transcription by RNA polymerase II.                                                                                      |
| <b>NSMCE2</b>                                                   | Non-SMC Element 2, MMS21 Homolog: Required for sister chromatid cohesion during prometaphase and mitotic progression.                                                                                          |
| <b>SMC3</b>                                                     | Structural Maintenance Of Chromosomes 3: Central component of cohesin, a complex required for chromosome cohesion during the cell cycle. Cohesion is coupled to DNA replication and is involved in DNA repair. |
| <b>TTK</b>                                                      | TTK Protein Kinase: found to be a critical mitotic checkpoint protein for accurate segregation of chromosomes during mitosis.                                                                                  |
| <b>SUPT16H</b>                                                  | Suppressor Of Ty 16 Homolog: involved in multiple processes that require DNA as a template such as mRNA elongation, DNA replication and DNA repair.                                                            |
| <b>HAT1</b>                                                     | Histone Acetyltransferase 1: May play a role in DNA repair in response to free radical damage.                                                                                                                 |
| <b>PRKDC</b>                                                    | Protein Kinase, DNA-Activated, Catalytic Polypeptide: functions with the Ku70/Ku80 heterodimer protein in DNA double strand break repair and recombination.                                                    |
| <b>RAD51AP1</b>                                                 | RAD51-Associated Protein 1: May participate in a common DNA damage response pathway associated with the activation of homologous recombination and double-strand break repair.                                 |
| <b>POLE2</b>                                                    | DNA Polymerase II Subunit 2: Participates in DNA repair and in chromosomal DNA replication                                                                                                                     |
| <b>ASCC3</b>                                                    | Activating Signal Cointegrator 1 Complex Subunit 3: 3'-5' DNA helicase involved in repair of alkylated DNA.                                                                                                    |
| <b>GTF3C3</b>                                                   | General transcription factor                                                                                                                                                                                   |
| <b>RAD51AP1</b>                                                 | RAD51-Associated Protein 1. May participate in a common DNA damage response associated with double strand break repair                                                                                         |
| <b>MSH2</b>                                                     | MutS Homolog 2: Component of the post-replicative DNA mismatch repair system (MMR).                                                                                                                            |
| <b>LIG4</b>                                                     | Ligase IV, DNA, ATP-Dependent: The LIG4-XRCC4 complex is responsible for the NHEJ ligation step                                                                                                                |
| <b>PRIM1</b>                                                    | DNA Primase 49 KDa Subunit: DNA primase is the polymerase that synthesizes small RNA primers for the Okazaki fragments during DNA replication.                                                                 |
| UP REGULATED                                                    |                                                                                                                                                                                                                |
| <b>XRCC3</b>                                                    | member of the RecA/Rad51-related protein family that participates in homologous recombination to maintain chromosome stability and repair DNA damage. Implicated in breast cancer.                             |

**Table S1:** List of genes showing differential translational regulation (scored in both the RefSeq and Ensembl annotations) that are associated with growth control/oncogenesis/apoptosis (top panel) and DNA repair/cell cycle (lower panel).
